# Supplementary material for: NFATc1 signaling drives chronic ER stress responses to promote NAFLD progression
Source: HighWire-hosted journal article supplement (doi:10.1136/gutjnl-2021-325013), 2022-04-01

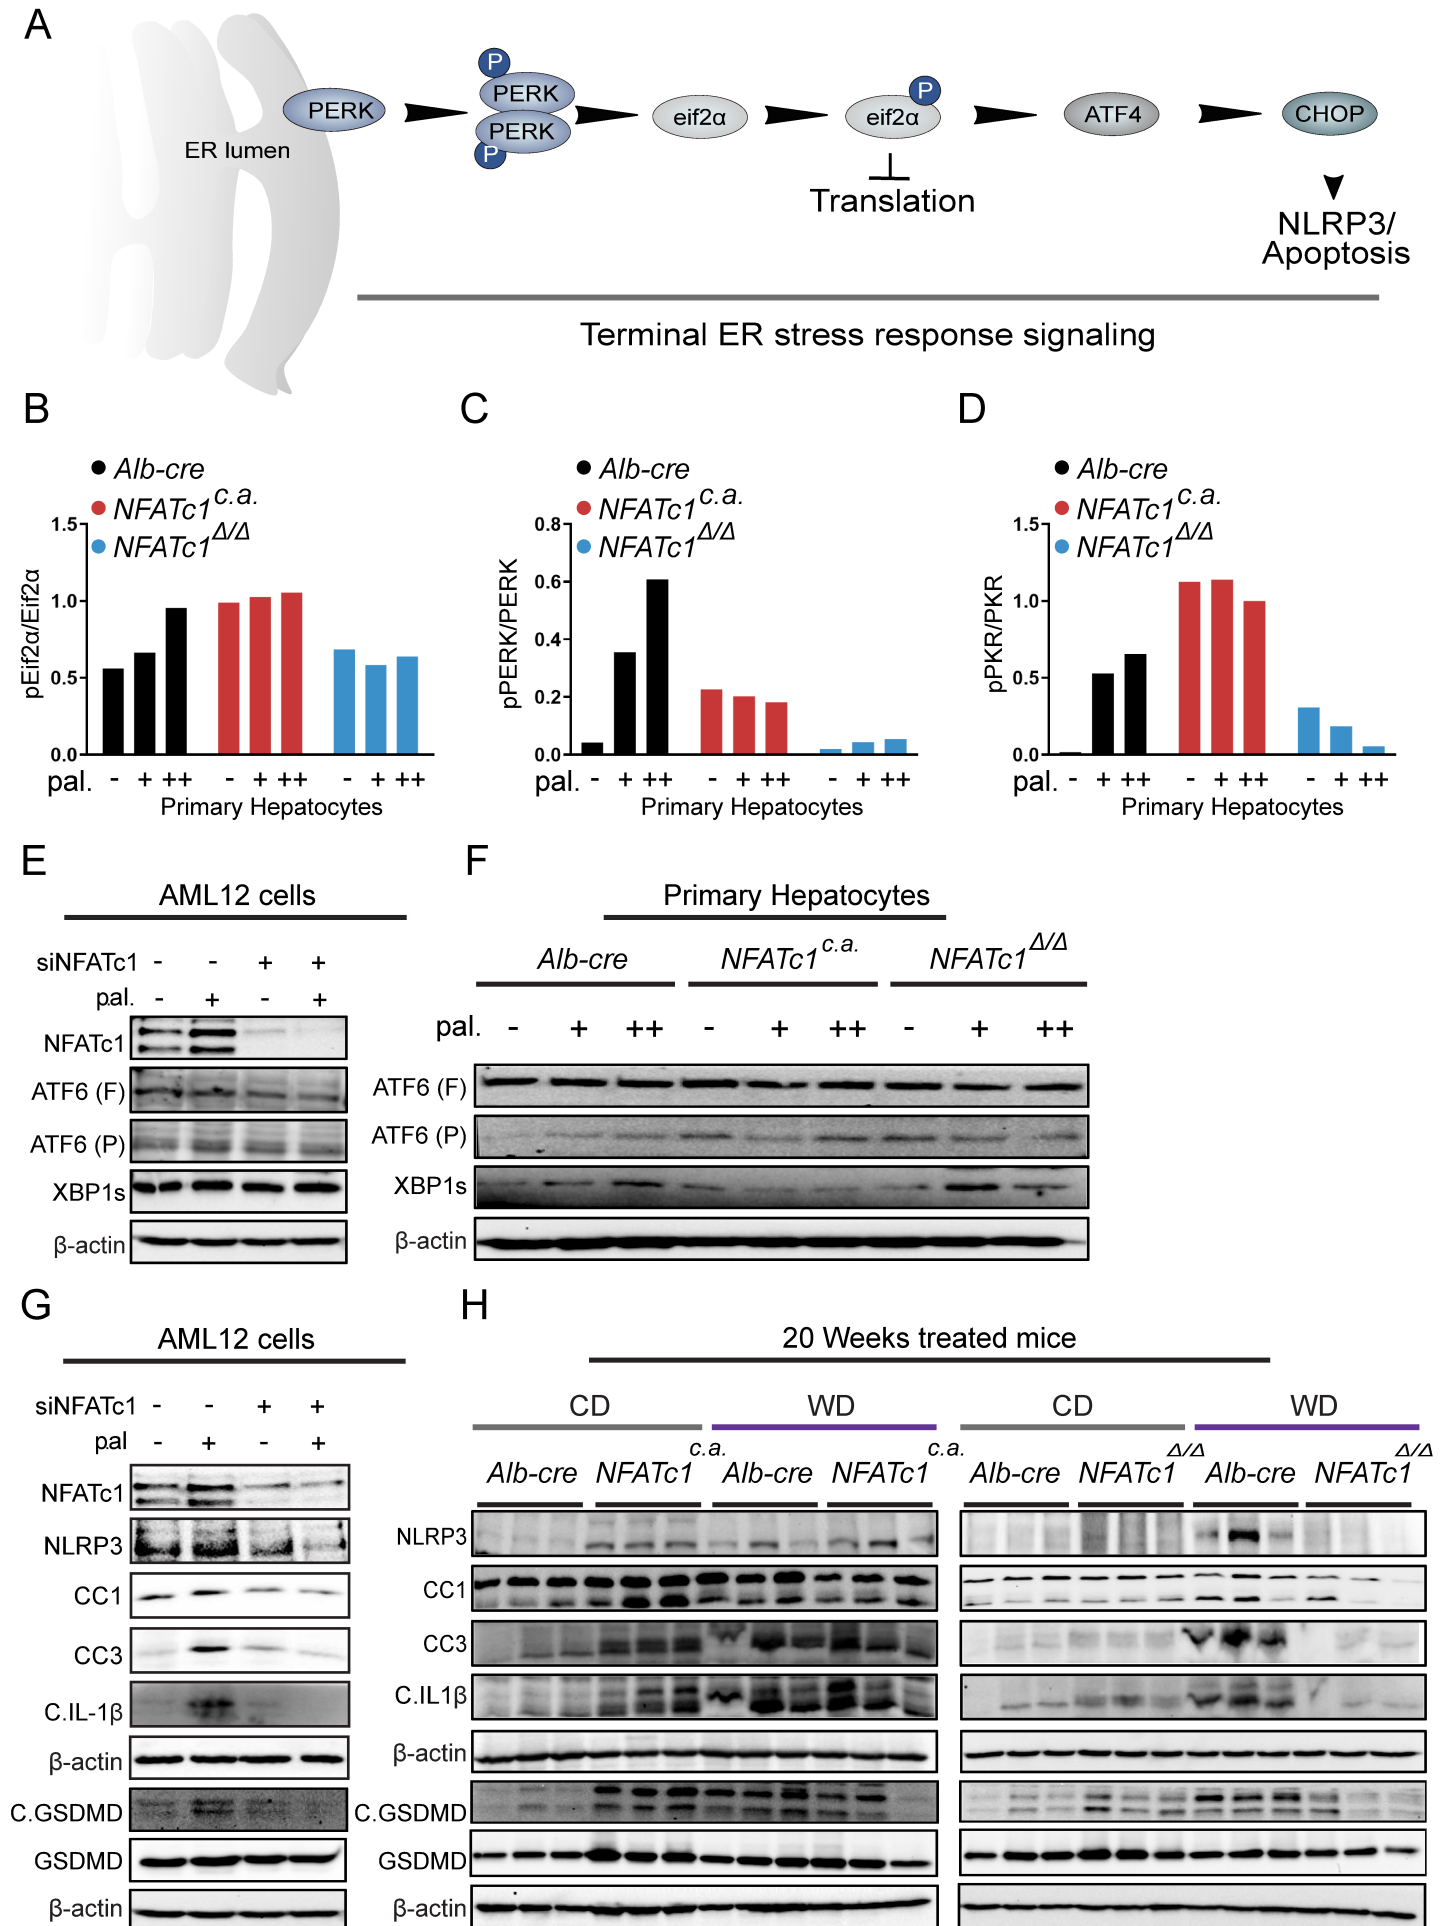

Supplement: gutjnl-2021-325013supp004_data_supplement.pdf [file gutjnl-2021-325013supp004_data_supplement.pdf]
